# Supplementary material for: Integrative bioinformatics analysis of high-throughput sequencing and in vitro functional analysis leads to uncovering key hub genes in esophageal squamous cell carcinoma
Source: Springer Nature journal article supplement (doi:10.1186/s41065-025-00398-4), 2025-03-14
Supplement: MOESM1 [file 41065_2025_398_MOESM1_ESM.pdf]

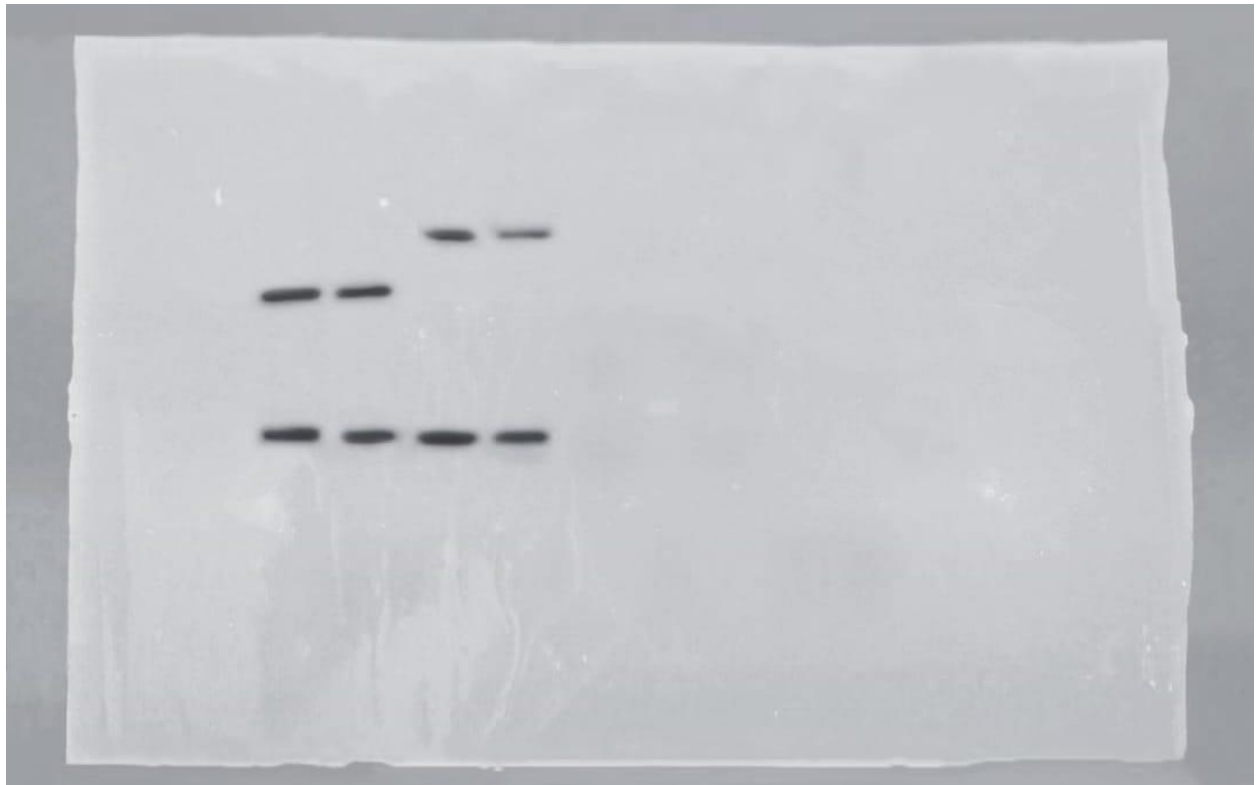

**Supplementary data Figure 1: Uncropped Western blot bands of COL3A1 and COL4A1.**
